# Supplementary material for: Augmenting the catalytic performance of spinel nanoferrites (CoFe2O4 and NiFe2O4) via incorporation of Al into the lattice
Source: Royal Society of Chemistry journal article supplement (doi:10.1039/c7nj01486d), 2017-01-01
Supplement: c7nj01486d1.pdf [file c7nj01486d1.pdf]

## **Supporting Information**

**Augmenting the catalytic performance of spinel nanoferrites (CoFe<sub>2</sub>O<sub>4</sub> and NiFe<sub>2</sub>O<sub>4</sub>) via incorporation of Al in to the lattice**

**Ankita Goyal<sup>a</sup>, S. Bansal<sup>b</sup>, B. Chudasama<sup>c</sup>, K.B. Tikoo<sup>d</sup>, V. Kumar<sup>d</sup> and Sonal Singhal<sup>a\*</sup>**

<sup>a</sup>Department of Chemistry, Panjab University, Chandigarh, 160014, India.

<sup>b</sup>Department of Science and Technology, New Delhi

<sup>c</sup>School of Physics & Materials Science, Thapar University, Patiala, 147004, India.

<sup>d</sup>HRTEM Lab Facility , NIPER, SAS Nagar-160062, Punjab, India.

**[sonal1174@gmail.com](mailto:sonal1174@gmail.com); [sonal@pu.ac.in](mailto:sonal@pu.ac.in)**

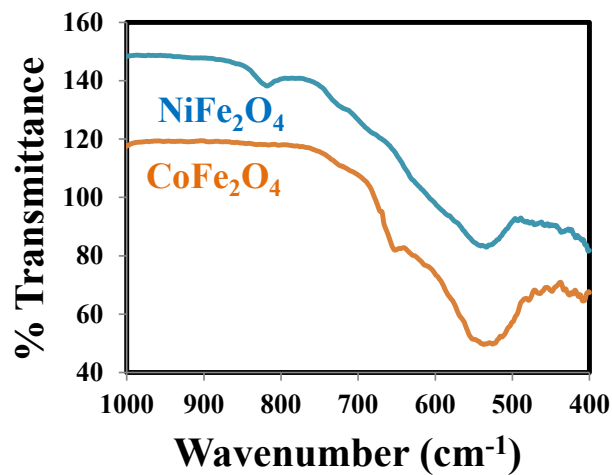

Fig. S1. The FT-IR spectra for  $\text{CoFe}_2\text{O}_4$  and  $\text{NiFe}_2\text{O}_4$  spinel nanoferrites.

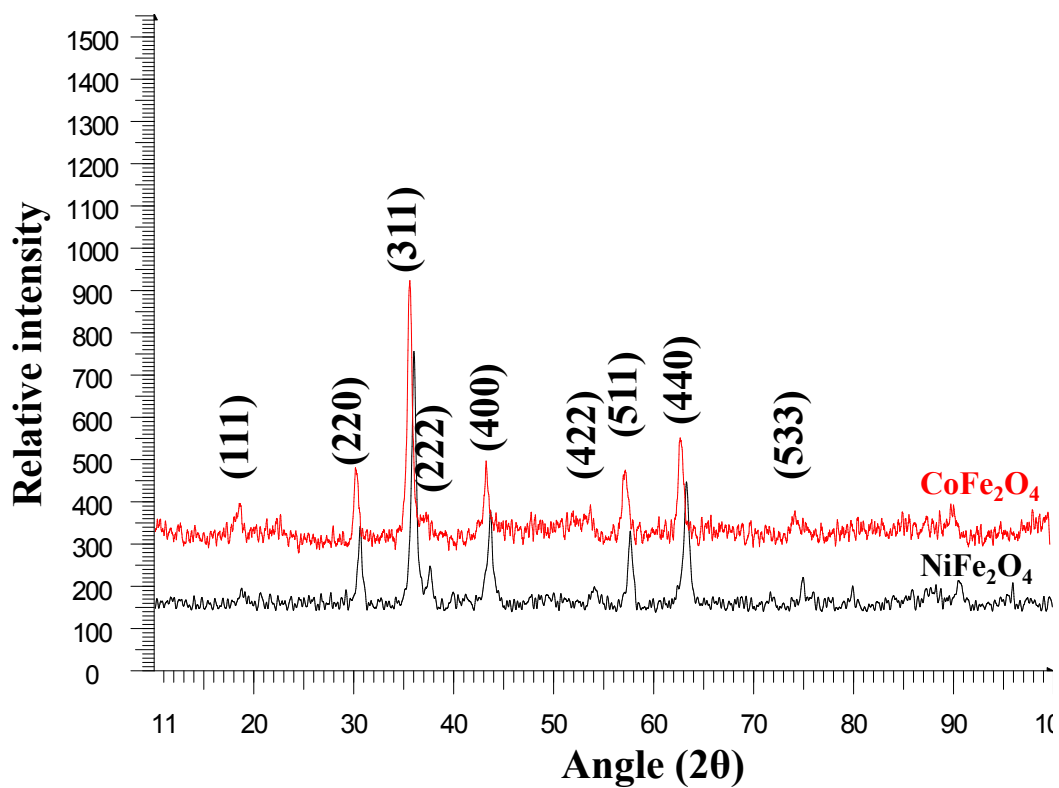

Fig. S2. The powder XRD patterns for  $\text{NiFe}_2\text{O}_4$  and  $\text{CoFe}_2\text{O}_4$  nanoferrites.

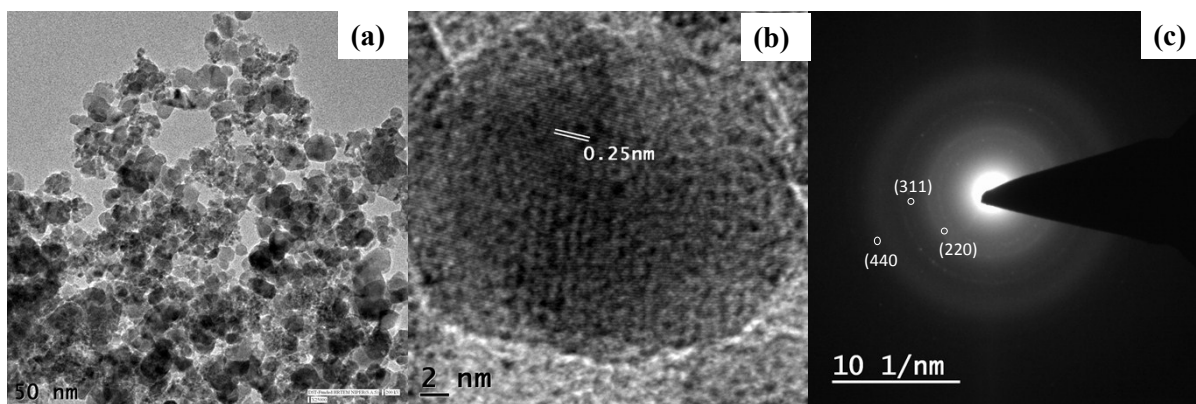

**Fig. S3. HR-TEM images displaying (a) Quasi-spherical particles, (b) interplanar spacing and (c) SAED pattern for  $\text{CoFe}_2\text{O}_4$ .**

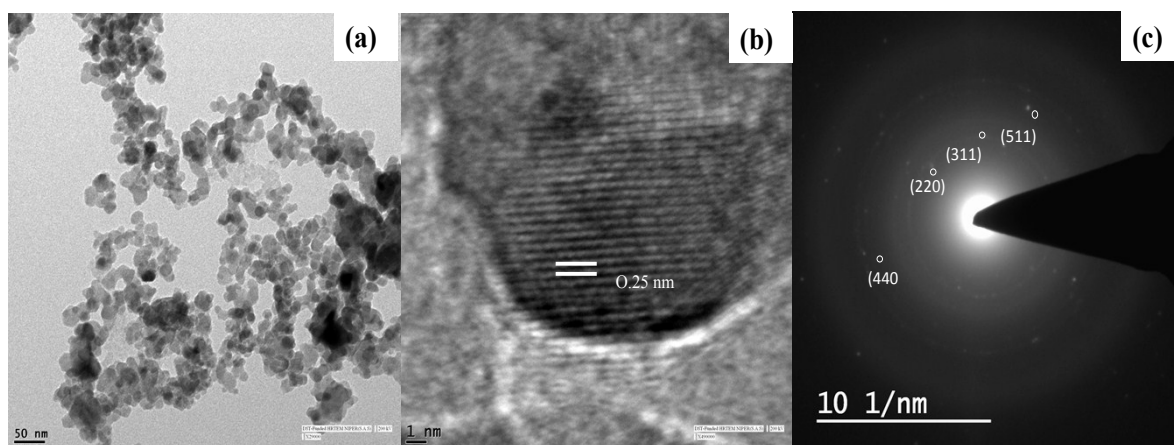

**Fig. S4. HR-TEM images displaying (a) Quasi-spherical particles, (b) interplanar spacing and (c) SAED pattern for  $\text{NiFe}_2\text{O}_4$ .**

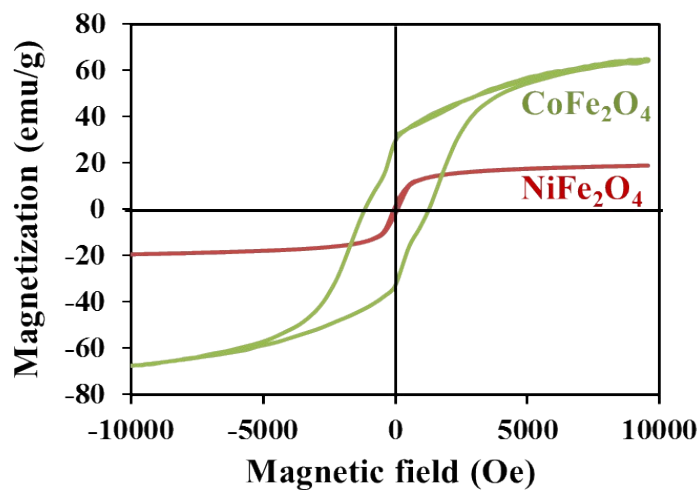

Fig. S5. Room temperature hysteresis loops for  $\text{CoFe}_2\text{O}_4$  and  $\text{NiFe}_2\text{O}_4$ .

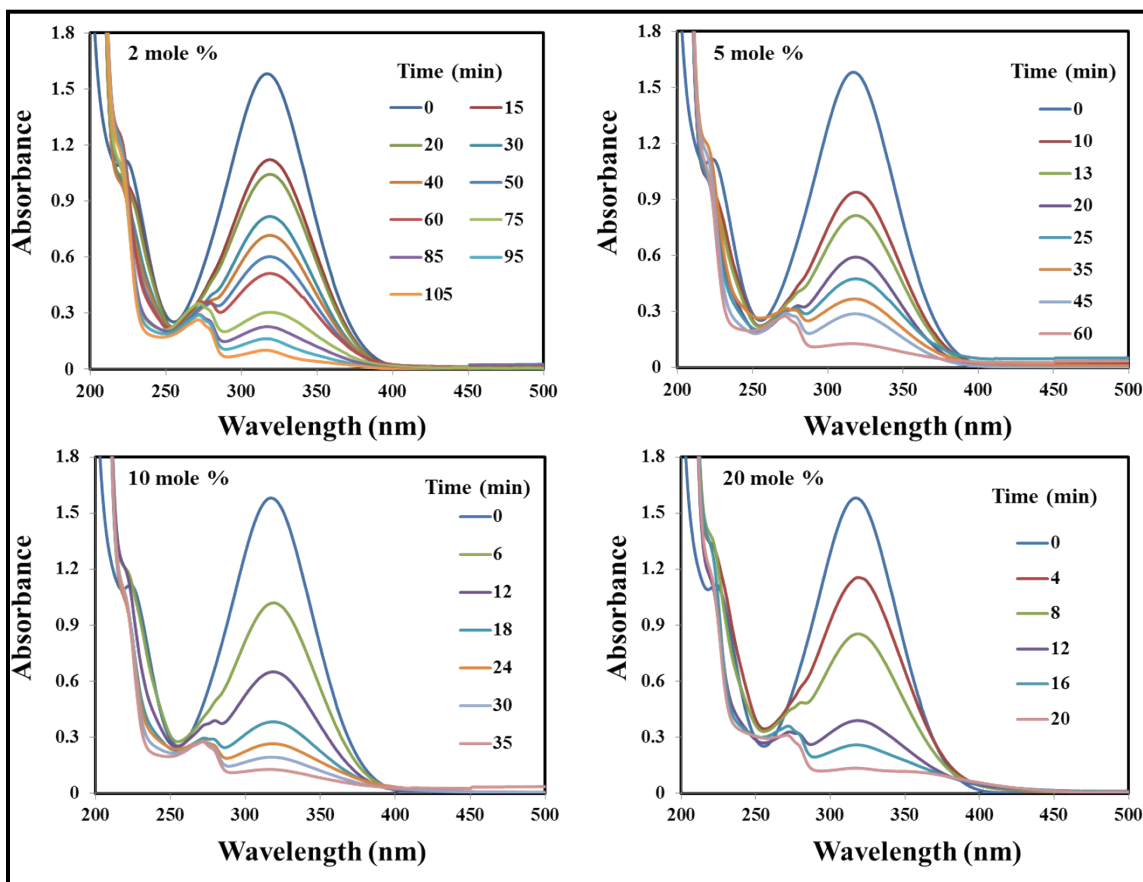

Fig. S6. Time dependent UV-visible spectra for the reduction of 4-NP in the presence of varying amounts of  $\text{CoAl}_{0.6}\text{Fe}_{1.4}\text{O}_4$ .

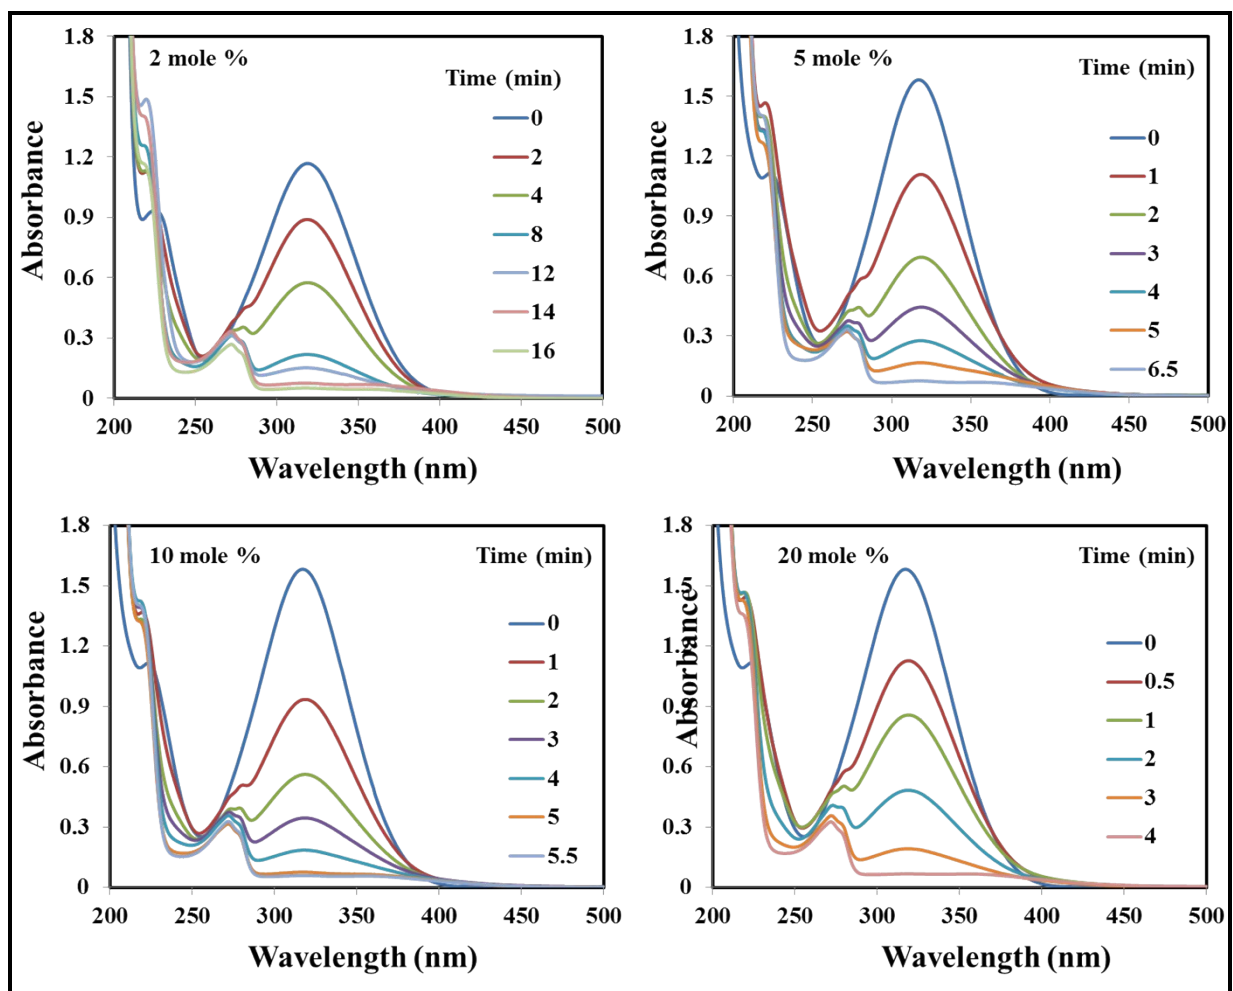

Fig. S7. Time dependent UV-visible spectra for the reduction of 4-NP in the presence of varying amounts of  $\text{NiAl}_{0.6}\text{Fe}_{1.4}\text{O}_4$ .

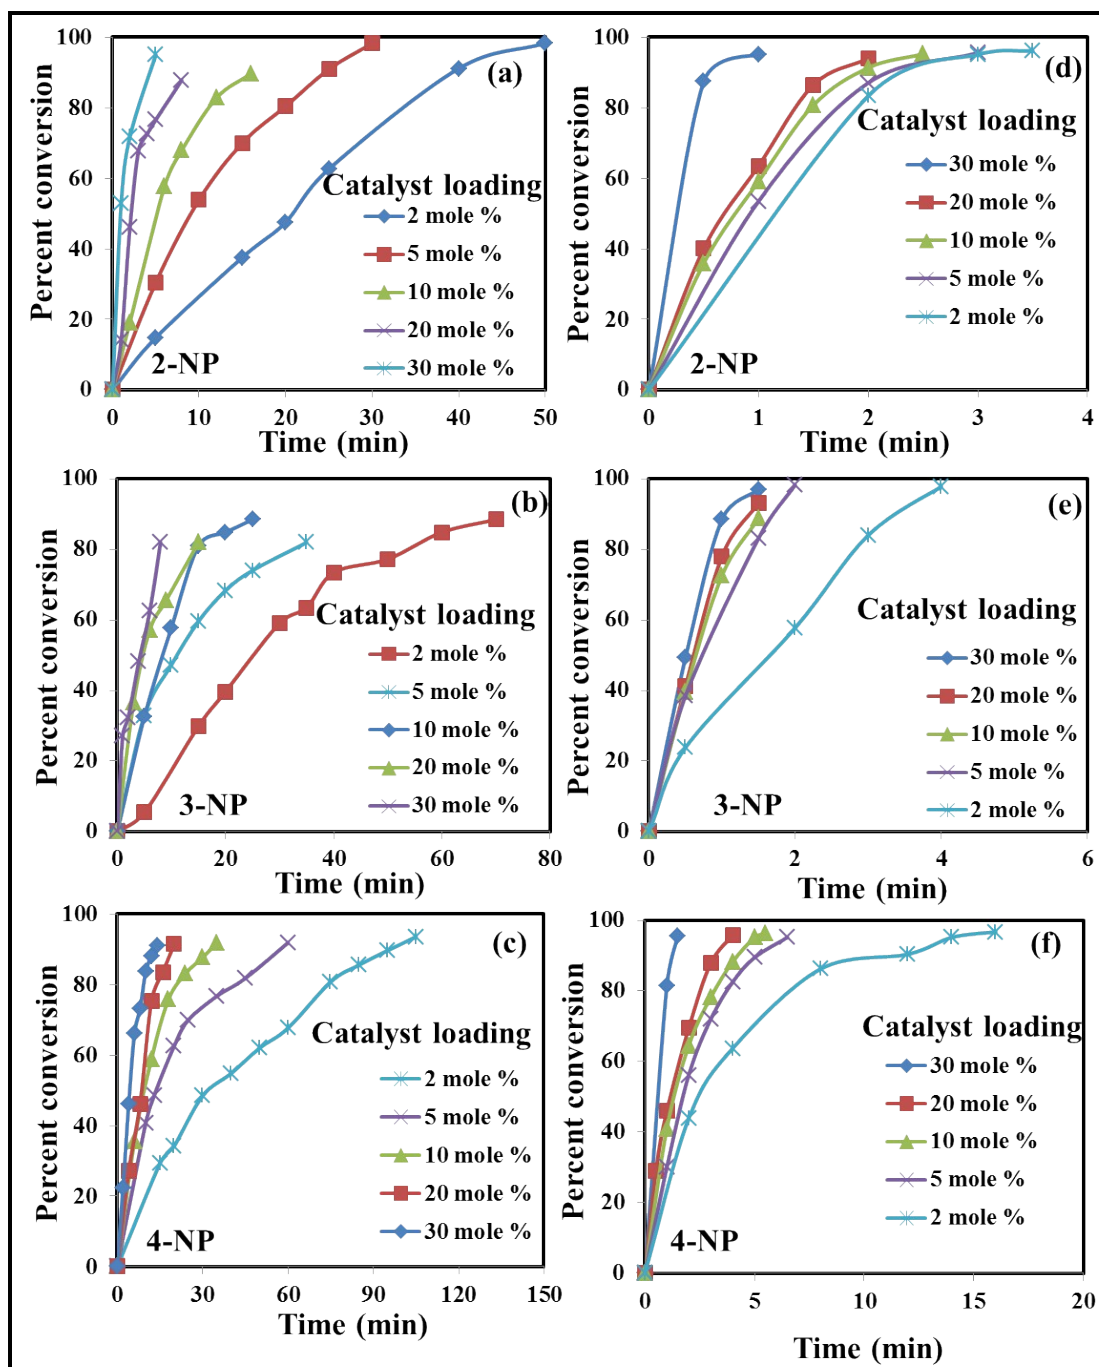

Fig. S8. Typical % Conversion vs. Time curves for the reduction of (a) 2-NP, (b) 3-NP and (c) 4-NP in the presence of varying amounts of  $\text{CoAl}_{0.6}\text{Fe}_{1.4}\text{O}_4$  and (d) 2-NP, (e) 3-NP and (f) 4-NP in the presence of varying amounts of  $\text{NiAl}_{0.6}\text{Fe}_{1.4}\text{O}_4$  as catalysts respectively.

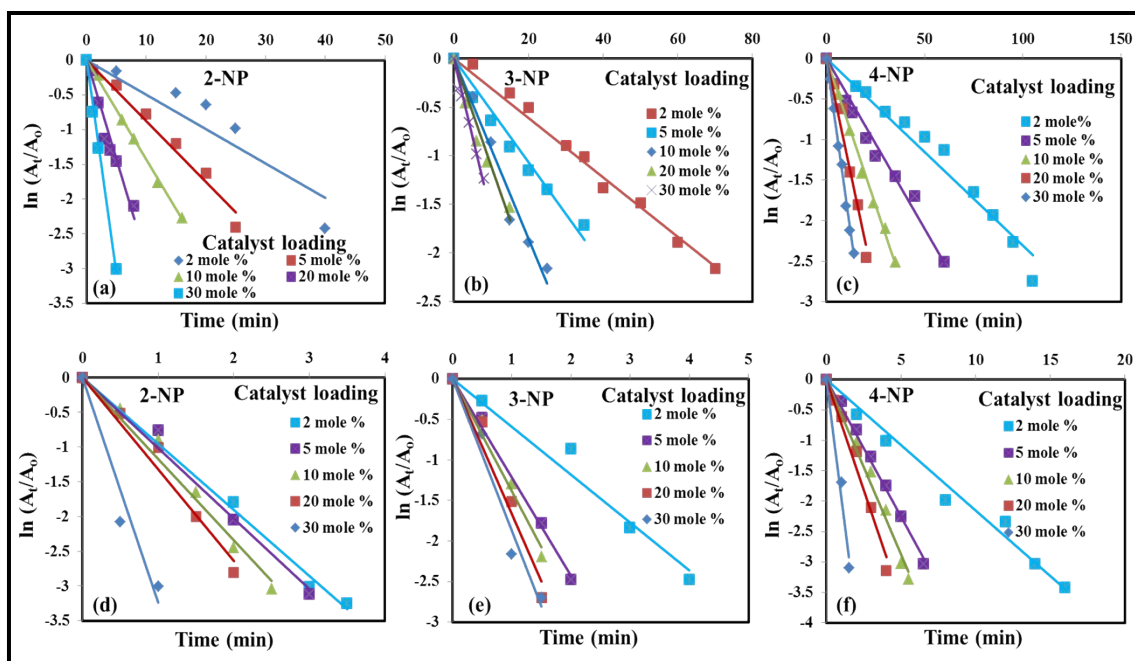

**Fig. S9.** Typical  $\ln(A_t/A_0)$  vs. Time curves for the reduction of (a) 2-NP, (b) 3-NP and (c) 4-NP in the presence of varying amounts of  $\text{CoAl}_{0.6}\text{Fe}_{1.4}\text{O}_4$  and (d) 2-NP, (e) 3-NP and (f) 4-NP in the presence of varying amounts of  $\text{NiAl}_{0.6}\text{Fe}_{1.4}\text{O}_4$  as catalysts respectively.

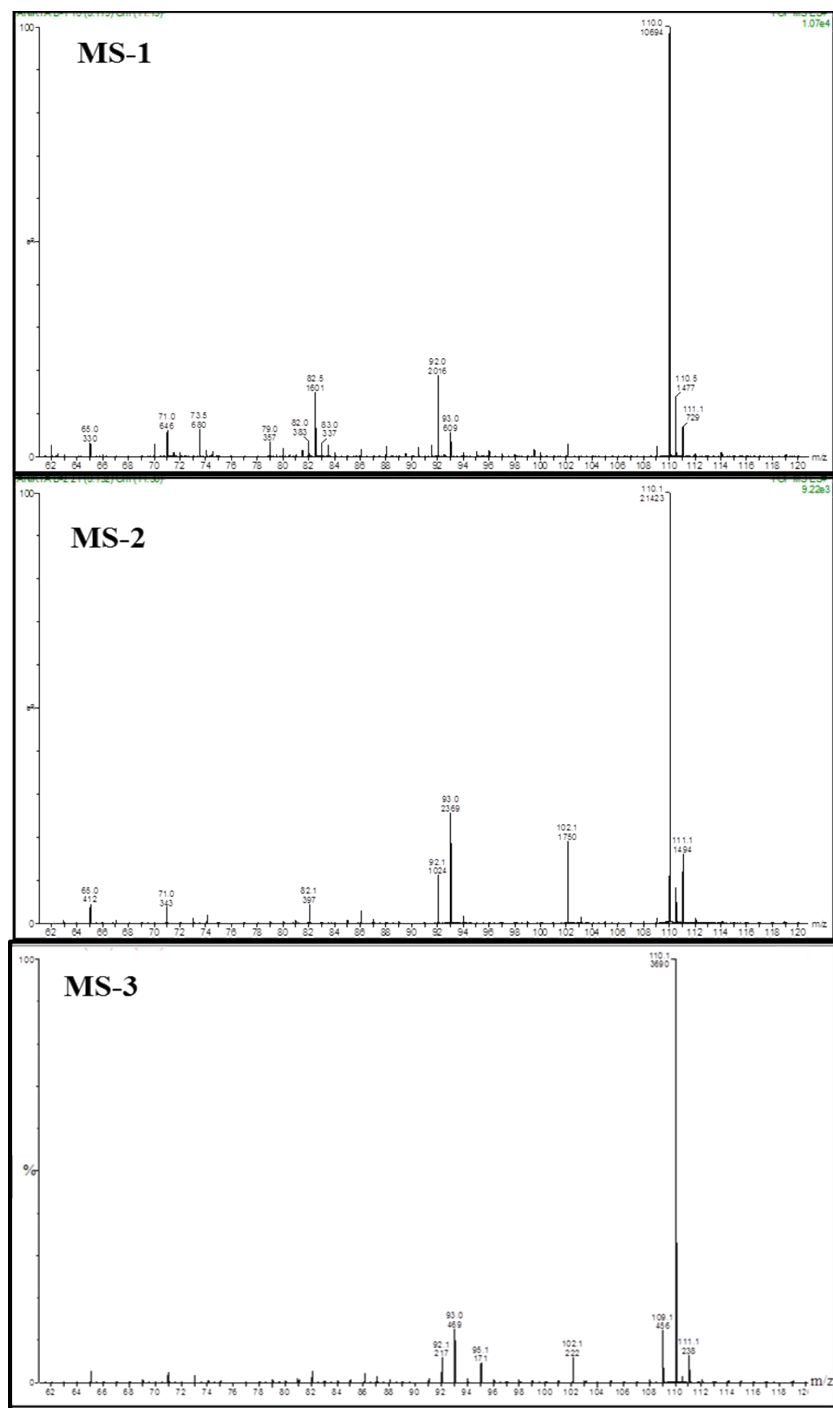

**Fig. S10. Mass spectra for the reduction product of 2-NP (MS-1), 3-NP (MS-2) and 4-NP (MS-3).**



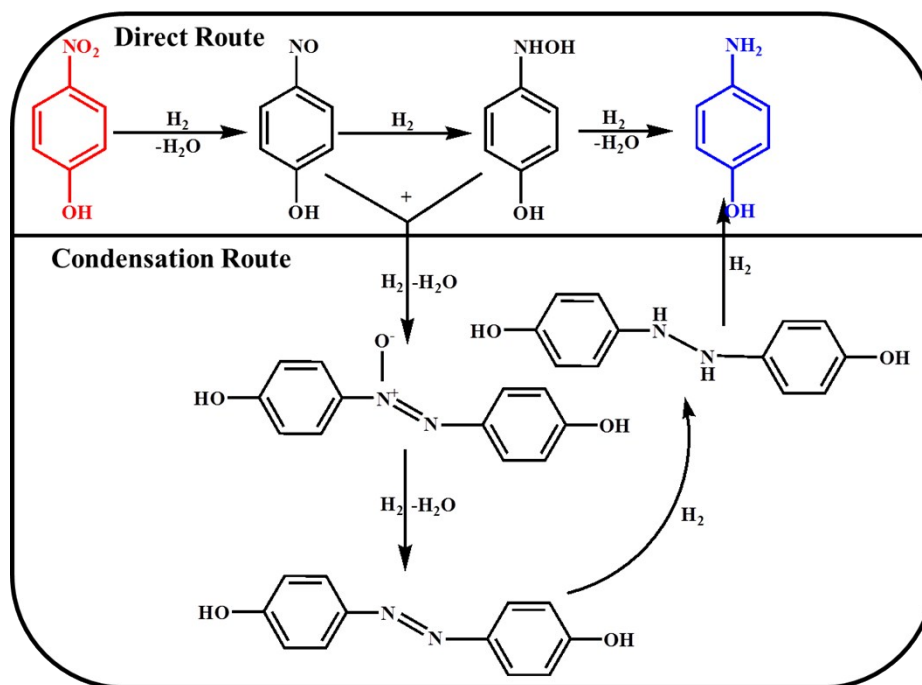

**Scheme. S1. Representation of the direct route and the condensation route for the reduction of nitrophenols.**
